# Supplementary material
Source: PubMed Central journal article supplement (PMC2906812)

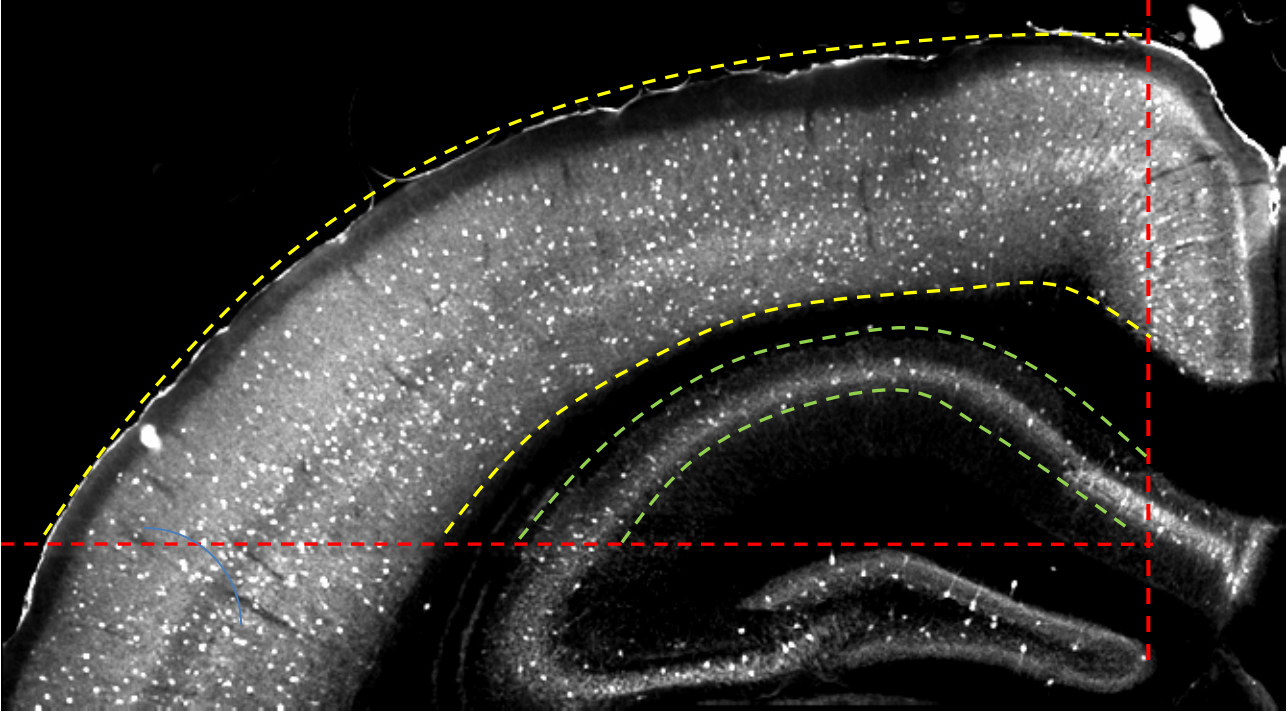

Supp Fig 1 LeBlanc et al

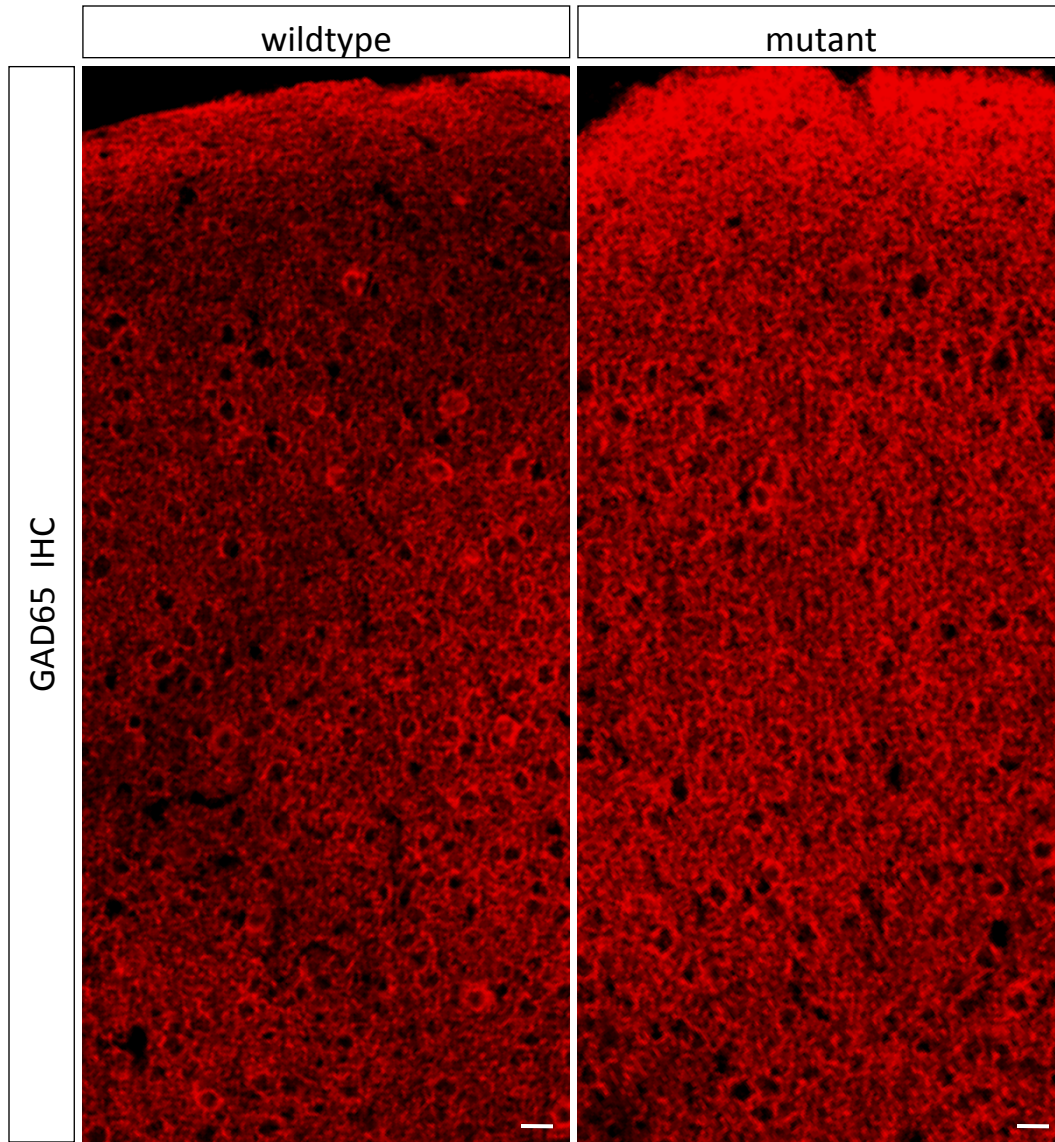

Suppl Fig 2 LeBlanc et al

Supplement: NIHMS204406-supplement-Supplementary_Figures.pdf [file NIHMS204406-supplement-Supplementary_Figures.pdf]
